# Supplementary material
Source: Springer Nature journal article supplement (https://www.springermedizin.de/resource/supplementary/13024_2014_540_MOESM2_ESM.pdf/9644348)
Supplement: MOESM2 [file 9644348]

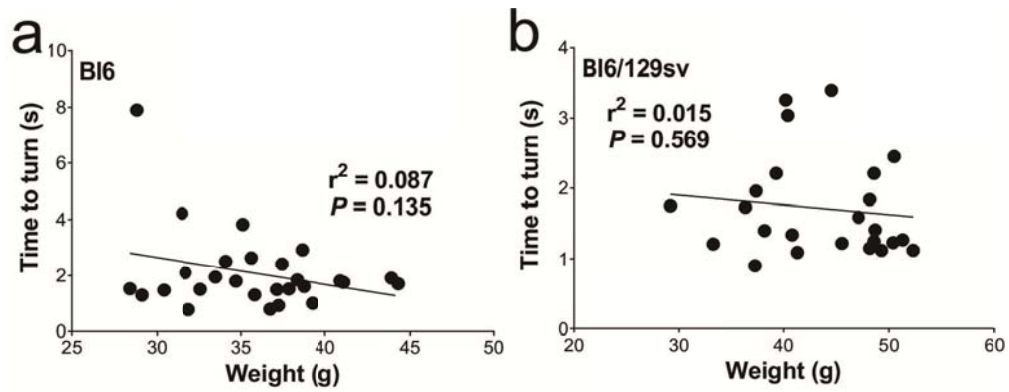

**Figure S2.** No correlation between weight and Pole test performance in 12-month-old mice (n as indicated in **Figure 3**). **a)** Between all mice in Bl6 background and weight ( $r^2 = 0.087$ ,  $p = 0.135$  by linear regression). **c)** Between all mice in Bl6/129sv background and weight ( $r^2 = 0.015$ ,  $p = 0.569$ ).
